# Supplementary material for: Evaluation of Deep Eutectic Systems as an Alternative to Solvents in Painting Conservation
Source: PubMed Central journal article supplement — ACS Sustain Chem Eng. 2021 Nov 11;9(46):15451–60. doi: 10.1021/acssuschemeng.1c04591 (PMC8612153; doi:10.1021/acssuschemeng.1c04591), 2021-11-11
Supplement: sc1c04591_si_001.pdf [file sc1c04591_si_001.pdf]

# Supporting Information

## Evaluation of deep eutectic systems as an alternative to solvents in Paintings Conservation

*†Cláudio Correia Fernandes, †Reza Haghbakhsh, ‡Raquel Marques, †Alexandre Paiva, ‡Leslie Carlyle, †Ana Rita Cruz Duarte\**

† LAQV, REQUIMTE, Departamento de Química, Nova School of Science and Technology,  
2829-516 Caparica, Portugal.

‡ Department of Conservation and Restoration and LAQV-REQUIMTE, Nova School of Science  
and Technology, 2829-516 Caparica, Portugal

\* Corresponding author email: [aduarte@fct.unl.pt](mailto:aduarte@fct.unl.pt)

Number of pages: 17

Number of tables: 15

Number of figures: 0

## Density and Viscosity

The dynamic viscosities and densities of NADEs measured at 20-60 °C, as well their standard deviation is presented in table S1 and table S2, respectively.

**Table S1.** Experimental viscosities (mPa.s) data of the studied NADESs as function of temperature (°C)

| T<br>(°C) | <i>Dynamic Viscosity ± SD (mPa.s)</i> |               |               |               |                     |                     |
|-----------|---------------------------------------|---------------|---------------|---------------|---------------------|---------------------|
|           | Men+Thy (2:1)                         | Men+Thy (4:1) | Men+Lau (4:1) | Men+Bor (7:2) | Men+Lau+Dec (2:1:1) | Men+Lau+Dec (4:1:1) |
| <b>20</b> | 68.94 ± 0.16                          | 79.69 ± 0.18  | 42.50 ± 0.62  | 150.69 ± 0.33 | 23.24 ± 0.04        | 30.11 ± 0.07        |
| <b>30</b> | 29.77 ± 0.05                          | 33.34 ± 0.01  | 22.22 ± 0.03  | 56.22 ± 0.16  | 14.53 ± 0.01        | 17.36 ± 0.03        |
| <b>40</b> | 15.16 ± 0.02                          | 16.47 ± 0.05  | 12.87 ± 0.04  | 25.22 ± 0.09  | 9.66 ± 0.01         | 10.83 ± 0.04        |
| <b>50</b> | 8.64 ± 0.01                           | 9.15 ± 0.04   | 8.03 ± 0.03   | 12.94 ± 0.06  | 6.71 ± 0.05         | 7.15 ± 0.06         |
| <b>60</b> | 5.42 ± 0.04                           | 5.60 ± 0.01   | 5.36 ± 0.03   | 7.44 ± 0.04   | 4.88 ± 0.05         | 5.00 ± 0.05         |

**Table S2.** Experimental densities (g/cm<sup>3</sup>) data of the studied NADESs as function of temperature (°C).

| T<br>(°C) | <i>Density ± SD (g/cm<sup>3</sup>)</i> |                 |                 |                 |                     |                     |
|-----------|----------------------------------------|-----------------|-----------------|-----------------|---------------------|---------------------|
|           | Men+Thy (2:1)                          | Men+Thy (4:1)   | Men+Lau (4:1)   | Men+Bor (7:2)   | Men+Lau+Dec (2:1:1) | Men+Lau+Dec (4:1:1) |
| <b>20</b> | 0.9236 ± 0.0006                        | 0.9137 ± 0.0004 | 0.8973 ± 0.0007 | 0.9132 ± 0.0003 | 0.8976 ± 0.0006     | 0.8981 ± 0.0006     |
| <b>30</b> | 0.9162 ± 0.0007                        | 0.9063 ± 0.0004 | 0.8901 ± 0.0006 | 0.9059 ± 0.0009 | 0.8902 ± 0.0007     | 0.8907 ± 0.0007     |
| <b>40</b> | 0.9088 ± 0.0005                        | 0.8990 ± 0.0003 | 0.8828 ± 0.0006 | 0.8986 ± 0.0002 | 0.8831 ± 0.0005     | 0.8836 ± 0.0005     |
| <b>50</b> | 0.9013 ± 0.0002                        | 0.8915 ± 0.0003 | 0.8755 ± 0.0006 | 0.8911 ± 0.0003 | 0.8758 ± 0.0004     | 0.8763 ± 0.0004     |
| <b>60</b> | 0.8937 ± 0.0001                        | 0.8839 ± 0.0002 | 0.8681 ± 0.0006 | 0.8836 ± 0.0004 | 0.8684 ± 0.0003     | 0.8689 ± 0.0004     |

# Calculation the characterization parameters of DESs

## Estimation of critical and thermodynamic properties

The detailed procedure for the calculation of the characterization parameters of DESs such as critical properties, acentric factors, densities, surface tensions and heat capacities are presented in this Supporting Information.

First of all, we should calculate critical properties of DESs. For each DES, the critical properties of the HBD and HBA are calculated separately by the method of Valderrama and Rojas <sup>1</sup>, which is a group contribution method based on the Modified Lydersen-Joback-Reid Method <sup>2</sup>, as follows:

$$\begin{aligned}T_b (\text{K}) &= 198.2 + \sum n \Delta T_b \\T_c (\text{K}) &= \frac{T_b}{0.5703 + 1.0121 \sum n \Delta T_c - (\sum n \Delta T_c)^2} \\P_c (\text{bar}) &= \frac{M_w}{(0.2573 + \sum n \Delta P_c)^2} \\V_c (\text{cm}^3/\text{mol}) &= 6.75 + \sum n \Delta V_c \\ \omega &= \frac{(T_b - 43)(T_c - 43)}{(T_c - T_b)(0.7 T_c - 43)} \log\left(\frac{P_c}{1.01325}\right) - \frac{(T_c - 43)}{(T_c - T_b)} \log\left(\frac{P_c}{1.01325}\right) + \log\left(\frac{P_c}{1.01325}\right) - 1\end{aligned} \tag{S1}$$

where  $T_b$ ,  $T_c$ ,  $P_c$ ,  $V_c$  and  $\omega$  are the normal boiling temperature, critical temperature, critical pressure, critical volume, and acentric factor, respectively.  $n$  is the number of occurrences of each group. The values of  $\Delta T_b$ ,  $\Delta T_c$ ,  $\Delta P_c$  and  $\Delta V_c$  for each group are presented in Table S3.

**Table S3.** The values of  $M_i$ ,  $\Delta T_b$ ,  $\Delta T_c$ ,  $\Delta P_c$  and  $\Delta V_c$  for decomposed functional group by the method by Valderrama and Rojas <sup>1</sup>.

|                      |        | $\Delta T_c$ | $\Delta P_c$ | $\Delta T_b$ |
|----------------------|--------|--------------|--------------|--------------|
| <b>Without Rings</b> |        |              |              |              |
| -CH3                 |        | 0.0275       | 0.3031       | 23.58        |
| -CH2 -               |        | 0.0159       | 0.2165       | 22.88        |
| >CH-                 |        | 0.0002       | 0.114        | 21.74        |
| >C<                  | [>C-]' | -0.0206      | 0.0539       | 18.25        |
| =CH <sub>2</sub>     |        | 0.017        | 0.2493       | 18.18        |
| =CH-                 |        | 0.0182       | 0.1866       | 24.96        |
| =C<                  |        | -0.0003      | 0.0832       | 24.14        |
| =C=                  |        | -0.0029      | 0.0934       | 26.15        |
| =CH                  |        | 0.0078       | 0.1429       |              |
| ≡C-                  | -COO-  | 0.0078       | 0.1429       |              |
| -OH                  |        | 0.0723       | 0.1343       | 92.88        |
| -O-                  | [-O]'  | 0.0051       | 0.13         | 22.42        |
| >C=O                 |        | 0.0247       | 0.2341       | 94.97        |
| -CHO                 |        | 0.0294       | 0.3128       | 72.24        |
| -COOH                |        | 0.0853       | 0.4537       | 169.06       |
| -COO-                |        | 0.0377       | 0.4139       | 81.1         |
| -HCOO-               |        | 0.036        | 0.4752       |              |
| =O                   |        | 0.0273       | 0.2042       | -10.5        |
| <b>(any_other)</b>   |        |              |              |              |
| -NH <sub>2</sub>     |        | 0.0364       | 0.1692       | 73.23        |
| -NH <sub>3</sub>     |        | 0.0364       | 0.1692       | 73.23        |
| -NH-                 |        | 0.0119       | 0.0322       | 50.17        |
| >N-                  |        | -0.0028      | 0.0304       | 11.74        |
| =N-                  |        | 0.0172       | 0.1541       | 74.6         |
| -CN                  |        | 0.0506       | 0.3697       | 125.66       |
| NO <sub>2</sub>      |        | 0.0448       | 0.4529       | 152.54       |
| -F                   |        | 0.0228       | 0.2912       | -0.03        |
| -Cl                  |        | 0.0188       | 0.3738       | 38.13        |
| -Br                  |        | 0.0124       | 0.5799       | 66.86        |

|                  |                      |         |         |        |
|------------------|----------------------|---------|---------|--------|
| -I               |                      | 0.0148  | 0.9174  | 93.84  |
| -P               |                      | -0.0084 | 0.1776  | 34.86  |
| -B               |                      | 0.0352  | 0.0348  | -24.56 |
| -S-              |                      | 0.0006  | 0.6901  | 117.52 |
| O=S=O            |                      | -0.0563 | -0.0606 | 147.24 |
| <b>(phenols)</b> |                      |         |         |        |
| >C=O             |                      | 0.0343  | 0.2751  | 94.97  |
| -NH-             |                      | 0.0244  | 0.0724  | 52.82  |
| >N-              | [>N < ] <sup>+</sup> | 0.0063  | 0.0538  | 68.16  |
| =N-              | [>N= ] <sup>+</sup>  | -0.0011 | 0.0559  | 57.55  |

Then by calculating the critical properties of the HBD and HBA, separately for each DES, the Lee–Kesler mixing rules, as recommended by Knapp et al. <sup>3</sup>, are used to calculate the critical properties of the DES:

$$\begin{aligned}
 MW_{DES} &= \sum_i x_i MW_i \\
 T_{C,DES} &= \frac{1}{V_{C,DES}^{0.25}} \sum_i \sum_j x_i x_j V_{cij}^{0.25} T_{cij} \\
 V_{C,DES} &= \sum_i \sum_j x_i x_j V_{cij} \\
 \omega_{DES} &= \sum_i x_i \omega_i \\
 T_{cij} &= \sqrt{T_{ci} T_{cj}} \\
 V_{cij} &= \frac{1}{8} (V_{ci}^{1/3} + V_{cj}^{1/3})^3 \\
 P_{C,DES} &= 0.2905 - 0.085 \omega_{DES} \frac{RT_{C,DES}}{V_{C,DES}}
 \end{aligned} \tag{S2}$$

where  $T_{C,DES}$ ,  $V_{C,DES}$ ,  $\omega_{DES}$  and  $P_{C,DES}$  are the DES critical temperature, critical volume, acentric factor, and critical pressure, respectively.

Then after calculation of critical properties and acentric factors of DES, Equation S3 is used to calculate densities of DESs <sup>4</sup>.

$$\rho = -1.13 \times 10^{-6} T_c^2 + 2.566 \times 10^{-3} T_c + 0.2376 \omega^{0.2211} - 4.67 \times 10^{-4} V_c - 4.64 \times 10^{-4} T \quad (\text{S3})$$

Where  $T_c$ ,  $V_c$  and  $\omega$  are the critical temperature in kelvins, critical volume in  $\text{cm}^3/\text{mol}$  and acentric factor of desired DES, respectively.  $\rho$  is desired density in  $\text{g}/\text{cm}^3$ .

At the next step by knowing densities, Equation S4 is used to calculate surface tensions of DESs <sup>5</sup>.

$$\sigma = 393.4 \ln(\rho) - 5.3 \times 10^{-5} \omega^{P_c} - 3.72 \times 10^{-2} T_c \ln(\rho^2 \left[ V_c - \frac{50.3}{\omega^2} \right]) + \frac{1.132 M_w \sqrt{T}}{P_c \ln\left(\frac{V_c \rho}{\sqrt{T_c}}\right)} + 108.9 \quad (\text{S4})$$

where  $P_c$ ,  $T_c$ ,  $V_c$  are the critical pressure in bars, critical temperature in kelvins, and critical volume  $\text{cm}^3/\text{mol}$ , respectively.  $\sigma$  and  $\rho$  are the surface tension and density at the desired temperature in  $\text{mN}/\text{m}$  and  $\text{g}/\text{cm}^3$ .

Finally, Equation S5 is applied for calculation of heat capacities of DESs <sup>6</sup>.

$$C_p = 3.8 \times 10^{-4} \frac{M_w^3}{P_c^6} + 6.3 \times 10^{-5} M_w^{2\omega} - \frac{24577.4}{M_w} - 94.9 + 132.27 T^{1/4} \quad (\text{S5})$$

where,  $M_w$ ,  $P_c$ ,  $\omega$  are the molecular weight in  $\text{g}/\text{mol}$ , critical pressure in  $\text{MPa}$ , and acentric factor of the DES, respectively.  $C_p$  is the heat capacity in  $\text{J}/\text{mol.k}$ .

**Binary mixture: aA:bB**

**Ex1: Menthol: Lauric acid (4:1)**

According to the molecular structure, the contribution of each constituent of both hydrogen bonding acceptor (HBA) and hydrogen bonding donor (HBD) is carried out.

**Table S4.1.** Menthol groups contribution.

| <b>Menthol (HBD)</b>                                                               | <b>Groups</b>                | <b>n</b> | $\Delta T_{bM}$ | $\Delta T_M$  | $\Delta P_M$  | $\Delta V_M$  |
|------------------------------------------------------------------------------------|------------------------------|----------|-----------------|---------------|---------------|---------------|
| 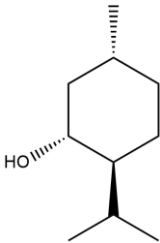 | -CH <sub>3</sub>             | 3        | 23.58           | 0.0275        | 0.3031        | 66.81         |
|                                                                                    | >CH-                         | 1        | 21.74           | 0.0002        | 0.114         | 45.7          |
|                                                                                    | -OH                          | 1        | 92.88           | 0.0723        | 0.1343        | 30.4          |
|                                                                                    | -CH <sub>2</sub> -<br>(ring) | 3        | 27.15           | 0.0116        | 0.1982        | 51.64         |
|                                                                                    | >CH-<br>(ring)               | 3        | 21.78           | 0.0081        | 0.1773        | 30.56         |
|                                                                                    | $\Sigma$                     |          |                 | <b>332.15</b> | <b>0.2141</b> | <b>2.2841</b> |

**Table S4.2.** Lauric acid groups contribution.

| <b>Lauric acid (HBA)</b>                                                            | <b>Groups</b>      | <b>n</b> | $\Delta T_{bM}$ | $\Delta T_M$  | $\Delta P_M$  | $\Delta V_M$  |
|-------------------------------------------------------------------------------------|--------------------|----------|-----------------|---------------|---------------|---------------|
| 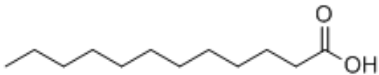 | -CH <sub>3</sub>   | 1        | 23.58           | 0.0275        | 0.3031        | 66.81         |
|                                                                                     | -CH <sub>2</sub> - | 10       | 27.15           | 0.0116        | 0.1982        | 51.64         |
|                                                                                     | -<br>COOH          | 1        | 169.06          | 0.0853        | 0.4537        | 88.6          |
|                                                                                     | $\Sigma$           |          |                 | <b>332.15</b> | <b>0.2141</b> | <b>2.2841</b> |

The results determined above in tables S4.1 and S4.2 are then used to calculate the critical parameters shown in equations S1:

**Table S5.** Critical properties of menthol and lauric acid.

| Compound           | Mw (g/mol) | T <sub>b</sub> (K) | T <sub>c</sub> (K) | P <sub>c</sub> (bar) | V <sub>c</sub> (cm <sup>3</sup> /mol) | ω     |
|--------------------|------------|--------------------|--------------------|----------------------|---------------------------------------|-------|
| <b>Menthol</b>     | 156.27     | 530.35             | 715.58             | 24.20                | 529.88                                | 0.700 |
| <b>Lauric acid</b> | 200.32     | 619.64             | 803.15             | 19.82                | 733.26                                | 0.883 |

Through the individual properties of each compound, the critical and the thermodynamic properties of the mixture are then calculated, using equations S2.

**Table S6.** Critical and thermodynamic properties of the mixture Menthol + lauric acid (4:1), at 298K.

| Mixture            | Mw<br>(g/mol) | T <sub>cm</sub> (K) | P <sub>cm</sub><br>(bar) | V <sub>cm</sub><br>(cm <sup>3</sup> /mol) | ω <sub>m</sub> | ρ (g/ml) | C <sub>p</sub> (J/K.mol) | σ<br>(mN/m) |
|--------------------|---------------|---------------------|--------------------------|-------------------------------------------|----------------|----------|--------------------------|-------------|
| Men +<br>Lau (4:1) | 165.08        | 732.64              | 24.41                    | 568.80                                    | 0.736          | 1.0915   | 314.05                   | 28.39       |

### Ternary mixture: aA:bB:cC

#### **Ex2:** Menthol + Lauric acid + Decanoic acid (4:1:1)

In these cases, first, is determined the critical properties of the two compounds **B** (lauric acid) and **C** (decanoic acid) as a binary mixture, thus, using the values from the table S3, table S4.1 and the equations S1-S2. The Molecular weight of decanoic acid is 172.26 g/mol.



**Table S7.** Calculation of parameters  $\Delta T_{bM}$ ,  $\Delta T_M$ ,  $\Delta P_M$  and  $\Delta V_M$  of Decanoic acid.

| Decanoic acid                                                                     | Groups             | n | $\Delta T_{bM}$ | $\Delta T_M$ | $\Delta P_M$  | $\Delta V_M$  |
|-----------------------------------------------------------------------------------|--------------------|---|-----------------|--------------|---------------|---------------|
| 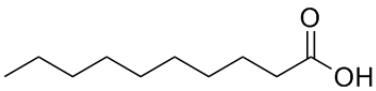 | -CH <sub>3</sub>   | 1 | 23.58           | 0.0275       | 0.3031        | 66.81         |
|                                                                                   | -CH <sub>2</sub> - | 8 | 27.15           | 0.0116       | 0.1982        | 51.64         |
|                                                                                   | -COOH              | 1 | 169.06          | 0.0853       | 0.4537        | 88.6          |
|                                                                                   | $\Sigma$           |   | <b>375.68</b>   | <b>0.240</b> | <b>2.4888</b> | <b>612.29</b> |

By the combination Lau + Dec (1:1) you get:

**Table S8.** Critical properties of the mixture Lauric acid + Decanoic acid (1:1), at 298,15K.

| Mixture                    | Mw<br>(g/mol) | $T_{cm}$ (K) | $P_{cm}$ (bar) | $V_{cm}$ (cm <sup>3</sup> /mol) | $\omega_m$ |
|----------------------------|---------------|--------------|----------------|---------------------------------|------------|
| <b>Lau + Dec<br/>(1:1)</b> | 186.29        | 781.14       | 21.04          | 675.34                          | 0.844      |

The mixture B+C can now be called **D**, and the molar fraction **d** given by the sum of b+c. The final calculations involve only aA:dD, then we can apply the same mixture rules.

Since we already have the information of critical properties of menthol (table S4.1) and D (table S8), using the equations S2-S5, we determine the critical and thermodynamic properties of the mixture.

**Table S9.** Critical and thermodynamic properties of the mixture Menthol: Lauric acid + Decanoic acid (4:1:1), at 298,15K.

| Mixture                                  | Mw<br>(g/mol) | T <sub>cm</sub> (K) | P <sub>cm</sub><br>(bar) | V <sub>cm</sub><br>(cm <sup>3</sup> /mol) | ω <sub>m</sub> | ρ (g/ml) | C <sub>p</sub><br>(J/K.mol) | σ<br>(mN/m) |
|------------------------------------------|---------------|---------------------|--------------------------|-------------------------------------------|----------------|----------|-----------------------------|-------------|
| <b>Men<br/>+Lau<br/>+Dec<br/>(4:1:1)</b> | 166.28        | 737.09              | 24.10                    | 577.06                                    | 0.748          | 1.0924   | 370.42                      | 50.09       |

### HSP parameters

Hansen solubility parameters ( $\delta_d$ ,  $\delta_p$  and  $\delta_h$ ) are calculated applying the contribution groups of Hoftyzer-Van Krevelen's method <sup>7</sup> to the following equations:

$$\delta_d = \frac{\sum F_{di}}{V} \quad \delta_p = \frac{\sqrt{\sum F_{pi}^2}}{V} \quad \delta_h = \frac{\sqrt{\sum E_{hi}}}{V} \quad (S6)$$

Where  $F_{di}$  and  $F_{pi}$  correspond to the dispersion and polar components per group to the molar attraction constant,  $F$ , proposed by Small <sup>8</sup>, and  $E_{hi}$  the hydrogen bonding energy per structural group.  $V$  is the molar volume of the molecule. The  $F_{di}$ ,  $F_{pi}$  and  $E_{hi}$  values are listed in table S10.

**Table S10.** Values of solubility parameter of each group contribution used Hoftyzer and Van Krevelen's method adapted from reference <sup>7</sup>.

| Structural Group   | F <sub>di</sub> (J <sup>1/2</sup> .cm <sup>3/2</sup> .mol <sup>-1</sup> ) | F <sub>pi</sub> (J <sup>1/2</sup> .cm <sup>3/2</sup> .mol <sup>-1</sup> ) | E <sub>hi</sub> (J <sup>1/2</sup> .cm <sup>3/2</sup> .mol <sup>-1</sup> ) |
|--------------------|---------------------------------------------------------------------------|---------------------------------------------------------------------------|---------------------------------------------------------------------------|
| -CH <sub>3</sub>   | 420                                                                       | 0                                                                         | 0                                                                         |
| -CH <sub>2</sub> - | 270                                                                       | 0                                                                         | 0                                                                         |
| >CH-               | 80                                                                        | 0                                                                         | 0                                                                         |
| >C<                | -70                                                                       | 0                                                                         | 0                                                                         |

|                                                                                   |      |      |       |
|-----------------------------------------------------------------------------------|------|------|-------|
| =CH <sub>2</sub>                                                                  | 400  | 0    | 0     |
| =CH-                                                                              | 200  | 0    | 0     |
| =C<                                                                               | 70   | 0    | 0     |
| 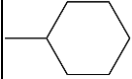 | 1620 | 0    | 0     |
|  | 1430 | 110  | 0     |
|  | 1270 | 110  | 0     |
| -F                                                                                | 220  | -    | -     |
| -Cl                                                                               | 450  | 550  | 400   |
| -Br                                                                               | 550  | -    | -     |
| -CN                                                                               | 430  | 1100 | 2500  |
| -OH (alcohol)                                                                     | 210  | 500  | 20000 |
| -O-                                                                               | 100  | 400  | 3000  |
| -COH                                                                              | 470  | 800  | 4500  |
| -CO-                                                                              | 290  | 770  | 2000  |
| -COOH                                                                             | 530  | 420  | 10000 |
| -COO-                                                                             | 390  | 490  | 7000  |
| HCOO-                                                                             | 530  | -    | -     |
| -NH <sub>2</sub>                                                                  | 280  | -    | 8400  |
| >NH-                                                                              | 160  | 210  | 3100  |
| -N<                                                                               | 20   | 800  | 5000  |
| -NO <sub>2</sub>                                                                  | 500  | 1070 | 1500  |
| -S-                                                                               | 440  | -    | -     |
| =PO <sub>4</sub> -                                                                | 740  | 1890 | 13000 |

|      |     |   |   |
|------|-----|---|---|
| ring | 190 | - | - |
|------|-----|---|---|

### Binary mixture

The mixture Menthol + Lauric acid (4:1) can be used as a theoretical example of the calculations. The first step is the calculation of each of individual component of the DES:

**Table S11.** HSP group contributions of Menthol

#### Menthol

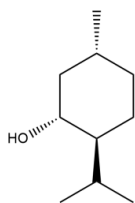

| Groups                                                                            | n  | <i>F<sub>di</sub></i> | <i>F<sub>pi</sub><sup>2</sup></i> | <i>E<sub>hi</sub></i> |
|-----------------------------------------------------------------------------------|----|-----------------------|-----------------------------------|-----------------------|
| -CH <sub>3</sub>                                                                  | 3x | 420                   | 0                                 | 0                     |
| >CH-                                                                              | 1x | 80                    | 0                                 | 0                     |
| 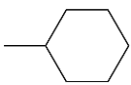 | 1x | 1620                  | 0                                 | 0                     |
| -OH                                                                               | 1x | 210                   | 250000                            | 20000                 |
|                                                                                   |    | 3170                  | 250000                            | 20000                 |

$$V = \frac{Mw}{\rho} = \frac{156.27g/mol}{0.89g/cm^3} = 175,58 \text{ cm}^3/mol$$

$$\delta_d = \frac{\sum F_{di}}{V} = \frac{3170}{175.58} = 18.05 \text{ J}^{1/2} \text{ cm}^{-3/2}$$

$$\delta_p = \frac{\sqrt{\sum F_{pi}^2}}{V} = \frac{\sqrt{250000}}{175.58} = 2.85 \text{ J}^{1/2} \text{ cm}^{-3/2}$$

$$\delta_h = \sqrt{\frac{\sum E_{hi}}{V}} = \sqrt{\frac{20000}{175.58}} = 10.65 \text{ J}^{1/2} \text{ cm}^{-3/2}$$

$$\delta_t = \sqrt{\delta_d^2 + \delta_p^2 + \delta_h^2} = \sqrt{18.05^2 + 2.85^2 + 10.65^2} = 21.2 \text{ J}^{1/2} \text{ cm}^{-3/2}$$

#### Lauric acid

**Table S12** HSP group contributions of Lauric acid

| Groups           | n  | <i>F<sub>di</sub></i> | <i>F<sub>pi</sub><sup>2</sup></i> | <i>E<sub>hi</sub></i> |
|------------------|----|-----------------------|-----------------------------------|-----------------------|
| -CH <sub>3</sub> | 1x | 420                   | 0                                 | 0                     |

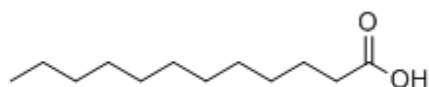

|              |     |      |        |       |
|--------------|-----|------|--------|-------|
| <b>-CH2-</b> | 10x | 270  | 0      | 0     |
| <b>-COOH</b> | 1x  | 530  | 176400 | 10000 |
|              |     | 3650 | 176400 | 10000 |

$$V = \frac{Mw}{\rho} = \frac{200.32g/mol}{0.88g/cm^3} = 227.64 \text{ cm}^3/mol$$

$$\delta_d = \frac{\sum F_{di}}{V} = \frac{3650}{227.64} = 16.03 \text{ J}^{1/2} \text{ cm}^{-3/2}$$

$$\delta_p = \frac{\sqrt{\sum F_{pi}^2}}{V} = \frac{\sqrt{176400}}{227.64} = 1.85 \text{ J}^{1/2} \text{ cm}^{-3/2}$$

$$\delta_h = \sqrt{\frac{\sum E_{hi}}{V}} = \sqrt{\frac{20000}{227.64}} = 6.63 \text{ J}^{1/2} \text{ cm}^{-3/2}$$

$$\delta_t = \sqrt{\delta_d^2 + \delta_p^2 + \delta_h^2} = \sqrt{16.03^2 + 1.85^2 + 6.63^2} = 17.4 \text{ J}^{1/2} \text{ cm}^{-3/2}$$

The second step is the calculation of the volume molar of the constituents in the mixture, using equation S7<sup>9,10</sup>:

$$\varphi_i = \frac{x_i V_i}{\sum_j x_j V_j} \quad (\text{S7})$$

Where  $x_i$ ,  $x_j$ ,  $V_i$  and  $V_j$  are the molar fraction and volume molar of component i and j, respectively. Considering menthol and lauric acid as the compound 1 and 2, respectively, then we have:

$$\varphi_1 = \frac{0.8 \times 175.58}{(0.8 \times 175.58 + 0.2 \times 227.63)} = 0.755$$

$$\varphi_2 = \frac{0.2 \times 227.63}{(0.8 \times 175.58 + 0.2 \times 227.63)} = 0.245$$

finally, the solubility parameters of the mixture are calculated using equations S8<sup>[11]</sup>:

(S8)

$$\delta_d^M = \delta_{d1}^{s1}\varphi_1 + \delta_{d2}^{s2}\varphi_2 = 18.05 \times 0.755 + 16.03 \times 0.245 = 17.56 \text{ J}^{1/2}\text{cm}^{-3/2}$$

$$\delta_p^M = \delta_{p1}^{s1}\varphi_1 + \delta_{p2}^{s2}\varphi_2 = 2.85 \times 0.755 + 1.85 \times 0.245 = 2.60 \text{ J}^{1/2}\text{cm}^{-3/2}$$

$$\delta_h^M = \delta_{h1}^{s1}\varphi_1 + \delta_{h2}^{s2}\varphi_2 = 10.65 \times 0.755 + 6.63 \times 0.245 = 9.68 \text{ J}^{1/2}\text{cm}^{-3/2}$$

$$\delta_t = \sqrt{(\delta_d^M)^2 + (\delta_p^M)^2 + (\delta_h^M)^2} = \sqrt{17.56^2 + 2.60^2 + 9.68^2} = 20.22 \text{ J}^{1/2}\text{cm}^{-3/2}$$

The Hansen solubility parameters of some typical solvents and NADESs components are presented in table S13 and S14, respectively. The mixtures of isooctane:isopropanol at different proportions and NADES systems are listed in table S15.

**Table S13.** Calculated values of Hansen solubility parameters of common solvents.

| Solvents    | HSP <sub>calc</sub>              |                                  |                                  |                                  | HSP <sup>11</sup>                |                                  |                                  |
|-------------|----------------------------------|----------------------------------|----------------------------------|----------------------------------|----------------------------------|----------------------------------|----------------------------------|
|             | $\delta_d$ (MPa <sup>1/2</sup> ) | $\delta_p$ (MPa <sup>1/2</sup> ) | $\delta_h$ (MPa <sup>1/2</sup> ) | $\delta_t$ (MPa <sup>1/2</sup> ) | $\delta_d$ (MPa <sup>1/2</sup> ) | $\delta_p$ (MPa <sup>1/2</sup> ) | $\delta_h$ (MPa <sup>1/2</sup> ) |
| Water       | -                                | -                                | -                                | -                                | 15.5                             | 16.0                             | 42.30                            |
| Methanol    | 15.6                             | 12.4                             | 22.2                             | 29.8                             | 15.1                             | 12.3                             | 22.3                             |
| Ethanol     | 15.4                             | 8.6                              | 18.5                             | 25.6                             | 15.8                             | 8.8                              | 19.4                             |
| Isopropanol | 14.8                             | 6.5                              | 16.2                             | 22.9                             | 15.8                             | 6.1                              | 16.4                             |
| Acetone     | 15.3                             | 10.4                             | 5.2                              | 19.2                             | 15.5                             | 10.4                             | 7.0                              |
| Toluene     | 17.4                             | 1.0                              | 0.0                              | 15.9                             | 18.0                             | 1.4                              | 2.0                              |
| Xylene      | 17.1                             | 0.9                              | 0.0                              | 17.1                             | 17.6                             | 1.0                              | 3.1                              |
| Iso-octane  | 14.4                             | 0.0                              | 0.0                              | 14.1                             | 14.0                             | 0.0                              | 0.0                              |

**Table S14.** The calculated values of Hansen solubility parameters of DES constituents.

| Compounds           | HSP <sub>calc</sub>              |                                  |                                  |                                  | HSP <sup>11</sup>                |                                  |                                  |
|---------------------|----------------------------------|----------------------------------|----------------------------------|----------------------------------|----------------------------------|----------------------------------|----------------------------------|
|                     | $\delta_d$ (MPa <sup>1/2</sup> ) | $\delta_p$ (MPa <sup>1/2</sup> ) | $\delta_h$ (MPa <sup>1/2</sup> ) | $\delta_t$ (MPa <sup>1/2</sup> ) | $\delta_d$ (MPa <sup>1/2</sup> ) | $\delta_p$ (MPa <sup>1/2</sup> ) | $\delta_h$ (MPa <sup>1/2</sup> ) |
| Menthol (Men)       | 18.1                             | 2.8                              | 10.7                             | 21.17                            | 16.6                             | 4.7                              | 10.6                             |
| Lauric acid (Lau)   | 16.0                             | 1.8                              | 6.6                              | 17.45                            | -                                | -                                | -                                |
| Myristic acid (Myr) | 15.8                             | 1.6                              | 6.1                              | 17.04                            | -                                | -                                | -                                |
| Decanoic acid (Dec) | 16.1                             | 2.2                              | 7.2                              | 17.79                            | -                                | -                                | -                                |
| Malic acid (Mal)    | 19.5                             | 9.3                              | 21.9                             | 30.7                             | -                                | -                                | -                                |
| Thymol (Thy)        | 19.0                             | 3.3                              | 11.3                             | 22.4                             | 19.0                             | 4.5                              | 10.8                             |
| Borneol (Bor)       | 20.3                             | 3.4                              | 11.6                             | 23.6                             | -                                | -                                | -                                |
| Lactic acid (Lac)   | 16.6                             | 8.7                              | 20.0                             | 27.5                             | 17.0                             | 8.3                              | 28.4                             |
| Betaine (Bet)       | 16.6                             | 8.0                              | 10.1                             | 21.0                             | -                                | -                                | -                                |

**Table 15:** Values corresponding to Hansen parameters and the total iso-octane: isopropanol (in different ratios) and NADES solubility.

| Mixtures/DES                  | HSP <sub>calc</sub>              |                                  |                                  |                                  |
|-------------------------------|----------------------------------|----------------------------------|----------------------------------|----------------------------------|
|                               | $\delta_d$ (MPa <sup>1/2</sup> ) | $\delta_p$ (MPa <sup>1/2</sup> ) | $\delta_h$ (MPa <sup>1/2</sup> ) | $\delta_t$ (MPa <sup>1/2</sup> ) |
| Iso-octane: Isopropanol (9:1) | 14.40                            | 0.32                             | 0.79                             | 14.42                            |
| Iso-octane: Isopropanol (8:2) | 14.42                            | 0.68                             | 1.67                             | 14.53                            |

|                                  |       |      |       |       |
|----------------------------------|-------|------|-------|-------|
| Iso-octane:<br>Isopropanol (7:3) | 14.44 | 1.08 | 2.67  | 14.73 |
| Iso-octane:<br>Isopropanol (6:4) | 14.47 | 1.54 | 3.81  | 15.04 |
| Iso-octane:<br>Isopropanol (5:5) | 14.50 | 2.07 | 5.11  | 15.52 |
| Iso-octane:<br>Isopropanol (4:6) | 14.54 | 2.68 | 6.62  | 16.20 |
| Iso-octane:<br>Isopropanol (3:7) | 14.59 | 3.39 | 8.39  | 17.16 |
| Iso-octane:<br>Isopropanol (2:8) | 14.64 | 4.24 | 10.49 | 18.50 |
| Iso-octane:<br>Isopropanol (1:9) | 14.70 | 5.27 | 13.04 | 20.34 |
|                                  |       |      |       |       |
| Men + Lau (2:1)                  | 17.3  | 2.5  | 9.1   | 19.7  |
| Men + Lau (4:1)                  | 17.6  | 2.6  | 9.7   | 20.2  |
| Men + Dec (2:1)                  | 17.4  | 2.6  | 9.4   | 19.9  |
| Men + Dec (7:2)                  | 17.6  | 2.7  | 9.8   | 20.3  |
| Men + Dec (1:3)                  | 16.6  | 2.3  | 8.0   | 18.6  |
| Men + Mal (8:1)                  | 18.1  | 3.2  | 11.3  | 21.6  |
| Men + Thy (1:1)                  | 18.0  | 3.0  | 11.0  | 21.3  |
| Men + Thy (2:1)                  | 18.0  | 3.0  | 10.9  | 21.3  |
| Men + Thy (4:1)                  | 18.0  | 2.9  | 10.8  | 21.2  |
| Men + Bor (7:2)                  | 18.5  | 2.9  | 10.9  | 21.6  |
| Thy + Bor (1:1)                  | 19.1  | 3.3  | 11.4  | 22.5  |
| Lac + Bet + Dec<br>(2:1:0.25)    | 16.5  | 7.5  | 14.4  | 23.1  |
| Lac + Bet + Dec<br>(2:1:0.35)    | 16.5  | 7.2  | 14.0  | 22.8  |



|                              |      |     |      |      |
|------------------------------|------|-----|------|------|
| Lac + Bet + Dec<br>(5:1:0.1) | 16.6 | 8.3 | 17.3 | 25.3 |
| Men + Lau + Dec<br>(2:1:1)   | 17.0 | 2.4 | 8.6  | 19.2 |
| Men + Lau + Dec<br>(4:1:1)   | 17.3 | 2.5 | 9.3  | 19.8 |

## References

1. Valderrama JO, Rojas RE. Critical properties of ionic liquids. Revisited. *Ind Eng Chem Res.* 2009;48(14):6890-6900. doi:10.1021/ie900250g
2. Lydersen AL, Station EE. *Estimation of Critical Properties of Organic Compounds by the Method of Group Contributions.* University of Wisconsin; 1955.
3. Knapp H, Doring R, Oellrich L, Plocker U, Prausnitz JM. Vapor-liquid equilibria for mixtures of low-boiling substances, Dechema Chemistry Data Series, Vol. VI, *Frankfurt/Main.* Published online 1982. doi: 10.1002/cite.330620533.
4. Haghbakhsh R, Bardool R, Bakhtyari A, Duarte ARC, Raeissi S. Simple and global correlation for the densities of deep eutectic solvents. *J Mol Liq.* 2019;296:111830. doi:10.1016/j.molliq.2019.111830
5. Haghbakhsh R, Taherzadeh M, Duarte ARC, Raeissi S. A general model for the surface tensions of deep eutectic solvents. *J Mol Liq.* 2020;307:112972. doi:10.1016/j.molliq.2020.112972
6. Taherzadeh M, Haghbakhsh R, Duarte ARC, Raeissi S. Estimation of the heat capacities of deep eutectic solvents. *J Mol Liq.* 2020;307:112940. doi: 10.1016/j.molliq.2020.112940.
7. Van Krevelen DW, Te Nijenhuis K. *Properties of Polymers.*; 2009. doi:10.1016/B978-0-08-054819-7.X0001-5
8. Small PA. Some factors affecting the solubility of polymers. *J Appl Chem.* 2007;3(2):71-80. doi:10.1002/jctb.5010030205
9. Kemény S, Rasmussen P. A derivation of local composition expressions from partition functions. *Fluid Phase Equilib.* 1981;7(2):197-203. doi:10.1016/0378-3812(81)85022-4
10. Sha J, Zhang R, Zun Y, et al. Equilibrium solubility, thermodynamic properties and Hansen solubility parameter of doxifluridine in (±)-2-ethyl-1-hexanol + (methanol, ethanol and acetone) at various temperatures. *J Mol Liq.* 2020;319. doi:10.1016/j.molliq.2020.114130
11. Lara J, Drolet D, Hansen C, Chollot A, Monta N. The use of the Hansen solubility parameters in the selection of protective polymeric materials resistant to chemicals. *Int J Curr Res.* 2017;9(3):47860-47867.
